# Supplementary material
Source: publisher figshare collection journal article supplement (https://gsapubs.figshare.com/articles/dataset/_/23200304)
Supplement: Supplementary file 1 [file 1]

Quek, L.X., et al., 2023, Southwest Borneo, an autochthonous Pangea-Eurasia assembly proxy:  
Insights from detrital zircon record: *Geology*, <https://doi.org/10.1130/G50966.1>

## Supplemental Material

**Figures S1–S2**

**Data Sets S1–S2**

**Data sources and methods.**

## DATA REPOSITORY

Figure S1: (A) Detrital zircon age distributions and SEM-CL images for zircon samples in this study. Bin width: 20 Ma. (B) Chondrite-normalized REE patterns for zircon samples in this study. Only ages of 250-200 Ma, 190-140 Ma and 140-90 Ma are plotted. (C) Discriminant diagram for zircon samples in this study with continental and ocean crust zircon fields defined in Grimes et al. (2007) and discriminant diagram with contrasting zircon source fields defined in Wang et al. (2012). No correction has been made to the trace element concentrations and the Pb concentration represents total Pb.

Figure S2. Large map: simplified Borneo geological map after Galin et al. (2017). Samples locations for this study are indicated on the map. Small map: simplified tectonic architecture of Proto-Borneo in the Mesozoic after Batara and Xu (2022), showing subduction zone controlled by Proto-Tethys and Meso-Tethys.

Dataset S1. Detrital zircon U-Pb isotopic data

Dataset S2. Detrital zircon Lu-Hf isotopic data

Data sources and methods

## GSA Supplemental Material

### **Data sources and methods to accompany ‘SW Borneo, an autochthonous Pangea-Eurasia assembly proxy: Insights from detrital zircon record’**

**Long Xiang Quek<sup>1</sup>, Shan Li<sup>1\*</sup>, C.K. Morley<sup>2</sup>, Azman A. Ghani<sup>3</sup>, Junbin Zhu<sup>4</sup>,  
Muhammad Hatta Roselee<sup>3</sup>, Sayed Murthadha<sup>5</sup>, Rezal Rahmat<sup>6</sup>, Yu-Ming Lai<sup>7</sup>,  
Lediyantje Lintjewas<sup>7</sup>**

*<sup>1</sup>Key Laboratory of Computational Geodynamics, College of Earth and Planetary Sciences,  
University of Chinese Academy of Sciences, 100049 Beijing, China*

*<sup>2</sup>PTT Exploration and Production, Chatuchak, 10900 Bangkok, Thailand*

*<sup>3</sup>Department of Geology, University Malaya, 50603 Kuala Lumpur, Malaysia*

*<sup>4</sup>Institute of Geology, Chinese Academy of Geological Sciences, 100037 Beijing, China*

*<sup>5</sup>Gampong Baru, Meuraxa, 23234 Banda Aceh, Indonesia*

*<sup>6</sup>Institute of Earth Sciences, Academia Sinica, 11529 Taiwan*

*<sup>7</sup>Department of Earth Sciences, National Taiwan Normal University, 11677 Taiwan*

## 36 DATA SOURCES FOR FIGURES

### 37 Figure 1

| Data label in Excel | n   | Reference                |
|---------------------|-----|--------------------------|
| Kuching             | 129 |                          |
| Sadong 1            | 130 | Breitfeld et al., 2017   |
| Sadong 2            | 142 |                          |
| Pedawan 2           | 70  |                          |
| Ngili 3             | 75  | Breitfeld and Hall, 2018 |
| Ngili 4             | 131 |                          |
| Karimunjawa 1       | 107 |                          |
| Karimunjawa 2       | 80  | Witts et al., 2012       |
| Tambak 2            | 92  |                          |
| Kuayan              | 29  |                          |
| Ketapang            | 59  |                          |
| Bengkayang 1        | 80  | Wang et al., 2022a       |
| Bengkayang 2        | 71  |                          |
| Bengkayang 3        | 79  |                          |
| Kerabai             | 90  |                          |
| Lubuk Antu 1        | 105 | Zhao et al., 2021        |
| Lubuk Antu 2        | 101 |                          |
| Lubuk Antu 3        | 81  |                          |
| Serabang 3          | 50  | Wang et al., 2021        |
| Serabang 1          | 78  |                          |
| Meratus Volc        | 82  | Wang et al., 2022b       |
| Keramaian           | 69  | Kueter et al., 2016      |

38

39

40 **Figure 2**

| Data label in Excel | n   | Reference                 |
|---------------------|-----|---------------------------|
| Lasipu 1            | 158 | Zimmermann and Hall, 2019 |
| Lasipu 3            | 91  |                           |
| Lasipu 4            | 103 |                           |
| Lasipu 5            | 128 |                           |
| Lasipu 6            | 32  |                           |
| Seical              | 141 |                           |
| Oe Baat 1           | 132 |                           |
| Ungar-Upper SST 1   | 122 |                           |
| Ungar-Upper SST 2   | 37  |                           |
| Ungar-Upper SST 4   | 131 |                           |
| Maru 1              | 111 | Zimmermann and Hall, 2016 |
| Maru 2              | 123 |                           |
| Maru 3              | 45  |                           |
| Maru 4              | 116 |                           |
| Maru 5              | 104 |                           |
| Maru 6              | 126 |                           |
| Maru 7              | 138 |                           |
| Maru 8              | 86  |                           |
| Niof 1              | 119 |                           |
| Niof 2              | 58  |                           |
| Niof 3              | 113 |                           |
| Niof 4              | 77  |                           |
| Niof 5              | 126 |                           |
| Babulu 1            | 130 |                           |
| Babulu 2            | 107 |                           |
| Ungar               | 123 |                           |
| Jurassic SST        | 133 |                           |

41

42

43

## METHODS

### Zircon U-Pb ages and trace elements

We follow the standard density and magnetic zircon separation techniques. Separated zircon grains were mounted on epoxy resin and brought into a high polish. We performed the measuring of U-Pb isotopes and trace elements using Laser Ablation Inductively Coupled Plasma Mass Spectrometry (LA-ICP-MS) at the In-situ Mineral Geochemistry Lab, Ore Deposit and Exploration Centre (ODEC), Hefei University of Technology, China. The analysis instrument is an Agilent 7900 Quadrupole ICP-MS coupled to a Photon Machines Analyte HE 193-nm ArF Excimer Laser Ablation system. Selection for analysis was as random as possible to include all grain-size fractions and reduce preference for large zircon grains. The ablation process was done in an atmosphere of UHP He (0.90 l/min), and the He carrier gas (flow rate set at 0.85 l/min) carries the aerosol out of the ablation cell to the plasma torch (after mixing with Ar gas immediately upon exiting). The ICP-MS system is optimized daily to maximize sensitivity on isotopes of the mass range of interest while keeping the production of molecular oxide species (i.e.,  $^{232}\text{Th}^{16}\text{O}/^{232}\text{Th}$ ) as low as possible, and usually <0.3% (Wang et al., 2017).

Our analyses use standard materials 91500 (zircon) (Wiedenbeck et al., 1995) and NIST610 (glass) as an external calibration for the U-Pb ages and trace element contents calculation, respectively (by bracketing each block of 10 unknowns). For quality control, we analyzed Plešovice zircon grains between every 10 unknown samples (Weighted mean  $^{206}\text{Pb}/^{238}\text{U}$  age:  $335 \pm 2$  Ma,  $2\sigma$ ,  $n=38$ , is close to the reported  $336 \pm 1$  Ma or  $338 \pm 1$  Ma,  $2\sigma$  from LA ICP-MS) (Sláma et al., 2008). Each data acquisition starts with a 20 s blank, before a further 40 s analysis time. Routine laser ablation conditions include a spot size of 30  $\mu\text{m}$  in diameter, a repetition rate of 7 Hz and an energy density of 2.5 J/cm<sup>2</sup>. We performed the offline data processing using ICPMSDataCal program (Liu et al., 2010). For filtered data

according to precision (10% cutoff), we use  $^{238}\text{U}/^{206}\text{Pb}$  ages for zircons <1.4 Ga and  $^{207}\text{Pb}/^{206}\text{Pb}$  ages for older zircons (Gehrels, 2011). And for filtered data according to discordance (10% to 30% cutoff), we use the single-grain concordia age (a type of weighted mean between the  $^{206}\text{Pb}/^{238}\text{U}$  and  $^{207}\text{Pb}/^{206}\text{Pb}$  ages) recommended by Vermeesch (2021) for better precision. Our kernel density estimation (KDE) plots with optimal bandwidth were done using IsoplotR (Vermeesch, 2018).

Scanning electron microscope cathodoluminescence (SEM-CL) imaging of the zircon grains was carried out using Tescan-Mira3 at Nanjing Hongchuang Geological Exploration Technology Service Co. Ltd. Through SEM-CL, we observe a high proportion of euhedral to subhedral zircon grains, with only a few rounded (Fig. DR1). The high proportion of unabraded zircon grains makes far fluvial transport doubtful; hence, they are probably mostly derived from relatively local sources. Detrital zircon grains from the samples typically show Th/U values between 1 and 0.1, which suggest that the zircon grains are mostly comparable to magmatic zircons from felsic and intermediate melt (Hoskin and Schaltegger, 2003; Linnemann et al., 2011). Only a limited amount of zircon grains shows Th/U values below 0.1, which may indicate similarity with metamorphic zircon grains. The U content of these analyzed zircon grains are high (average: ~770 ppm, max: ~4000 ppm).

### **Zircon Lu-Hf isotopes measurements**

Concordant zircon grains were selected for in-situ Lu-Hf isotopic analyses. In-situ zircon Lu-Hf isotope analysis was measured at MRL Key Laboratory of Metallogeny and Mineral Assessment, Institute of Mineral Resources, Chinese Academy of Geological Sciences (CAGS), Beijing by using a New Wave UP213 laser-ablation microprobe, attached to a Neptune multi-collector (LA MC ICP-MS). Wu et al. (2006) described the instrumental conditions and data. We used a stationary spot, with a beam diameter of either 40  $\mu\text{m}$  or 55

94  $\mu\text{m}$ , depending on the size of the previously ablated domains. He carrier gas transport the  
 95 ablated sample from the laser-ablation cell to the ICP-MS torch via an Ar mixing chamber.  
 96 Chu et al. (2002) proposed ratios of  $^{176}\text{Lu}/^{175}\text{Lu} = 0.02658$  and  $^{176}\text{Yb}/^{173}\text{Yb} = 0.796218$  were  
 97 used to correct the isobaric interferences of  $^{176}\text{Lu}$  and  $^{176}\text{Yb}$  on  $^{176}\text{Hf}$ . For instrumental mass  
 98 bias correction, Yb isotope ratios were normalized to  $^{172}\text{Yb}/^{173}\text{Yb} = 1.35274$  (Chu et al.,  
 99 2002) and Hf isotope ratios to  $^{179}\text{Hf}/^{177}\text{Hf} = 0.7325$  (Patchett and Tatsumoto, 1981) using an  
 100 exponential law (Albarède et al., 2004). The mass bias behavior of Lu was assumed to follow  
 101 that of Yb, following mass bias correction protocols detailed by Wu et al. (2006). Zircon GJ-  
 102 1 was our reference during routine analyses, with a weighted mean  $^{176}\text{Hf}/^{177}\text{Hf}$  ratio of  
 103  $0.282031 \pm 0.000014$  ( $2\sigma$ ,  $n=36$ ); it agrees with the weighted mean  $^{176}\text{Hf}/^{177}\text{Hf}$  ratio of  
 104  $0.282022 \pm 0.000011$  ( $2\sigma$ ,  $n=56$ ) (LA MC ICP-MS, Matteini et al., 2010).

105 We calculated the initial  $^{176}\text{Hf}/^{177}\text{Hf}$  ratios,  $\epsilon_{\text{Hf}}(t)$  values and model ages using the  
 106 zircon crystallization ages from U-Pb isotope analysis and adopting the decay constant for  
 107  $^{176}\text{Lu}$  and the chondritic ratios of  $^{176}\text{Hf}/^{177}\text{Hf}$  and  $^{176}\text{Lu}/^{177}\text{Hf}$ , which are  $1.867 \times 10^{-11}/\text{year}$   
 108 (Söderlund et al., 2004), and 0.282785 and 0.0336 (Bouvier et al., 2008), respectively. Our  
 109 calculations for the single-stage model age ( $T_{\text{DM1}}$ ) relative to the depleted mantle use a  
 110 present-day  $^{176}\text{Hf}/^{177}\text{Hf}$  ratio of 0.28325 and  $^{176}\text{Lu}/^{177}\text{Hf}$  ratio of 0.0384 (Griffin et al., 2004).  
 111 Calculation of two-stage model ages ( $T_{\text{DM2}}$ ) assumes a mean  $^{176}\text{Lu}/^{177}\text{Hf}$  value of 0.015 for  
 112 the average continental crust (Vervoort and Blichert-Toft, 1999; Griffin et al., 2002).

## 114 **Data processing method**

115 Data is processed according to the detrital zircon age distribution fingerprinting  
 116 method by Barham et al. (2022) via a modified  $\chi^2$ -distribution analysis and definition of the  
 117 10th to 50th age percentile of the detrital zircon populations. Maximum Likelihood Age  
 118 (MLA) is calculated according to Galbraith and Laslett (1993) and Vermeesch (2021) and the



significant age peaks are calculated according to Galbraith and Green (1990). Calculations are done using IsoplotR (Vermeesch, 2018).

## REFERENCES CITED

- Albarède, F., Telouk, P., Blichert-Toft, J., Boyet, M., Agranier, A., and Nelson, B., 2004, Precise and accurate isotopic measurements using multiple-collector ICPMS1  
Associate editor: Y. Amelin: *Geochimica et Cosmochimica Acta*, v. 68, p. 2725–2744, doi:10.1016/j.gca.2003.11.024.
- Barham, M., Kirkland, C.L., and Handoko, A.D., 2022, Understanding ancient tectonic settings through detrital zircon analysis: *Earth and Planetary Science Letters*, v. 583, p. 117425, doi:10.1016/j.epsl.2022.117425.
- Batara, B., and Xu, C., 2022, Evolved magmatic arcs of South Borneo: Insights into Cretaceous slab subduction: *Gondwana Research*, v. 111, p. 142–164, doi:10.1016/j.gr.2022.08.001.
- Bouvier, A., Vervoort, J.D., and Patchett, P.J., 2008, The Lu–Hf and Sm–Nd isotopic composition of CHUR: Constraints from unequilibrated chondrites and implications for the bulk composition of terrestrial planets: *Earth and Planetary Science Letters*, v. 273, p. 48–57, doi:10.1016/j.epsl.2008.06.010.
- Breitfeld, H.T., Hall, R., Galin, T., Forster, M.A., and BouDagher-Fadel, M.K., 2017, A Triassic to Cretaceous Sundaland–Pacific subduction margin in West Sarawak, Borneo: *Tectonophysics*, v. 694, p. 35–56, doi:10.1016/j.tecto.2016.11.034.
- Breitfeld, H.T., and Hall, R., 2018, The eastern Sundaland margin in the latest Cretaceous to Late Eocene: Sediment provenance and depositional setting of the Kuching and Sibuan Zones of Borneo: *Gondwana Research*, v. 63, p. 34–64, doi:10.1016/j.gr.2018.06.001.

144 Chu, N.-C., Taylor, R.N., Chavagnac, V., Nesbitt, R.W., Boella, R.M., Milton, J.A., German,  
 145 C.R., Bayon, G., and Burton, K., 2002, Hf isotope ratio analysis using multi-collector  
 146 inductively coupled plasma mass spectrometry: an evaluation of isobaric interference  
 147 corrections: *Journal of Analytical Atomic Spectrometry*, v. 17, p. 1567–1574,  
 148 doi:10.1039/B206707B.

149 Galbraith, R.F., and Green, P.F., 1990, Estimating the component ages in a finite mixture:  
 150 *International Journal of Radiation Applications and Instrumentation. Part D. Nuclear*  
 151 *Tracks and Radiation Measurements*, v. 17, p. 197–206, doi:10.1016/1359-  
 152 0189(90)90035-V.

153 Galbraith, R.F., and Laslett, G.M., 1993, Statistical models for mixed fission track ages:  
 154 *Nuclear Tracks and Radiation Measurements*, v. 21, p. 459–470, doi:10.1016/1359-  
 155 0189(93)90185-C.

156 Galin, T., Breitfeld, H.T., Hall, R., and Sevastjanova, I., 2017, Provenance of the Cretaceous–  
 157 Eocene Rajang Group submarine fan, Sarawak, Malaysia from light and heavy  
 158 mineral assemblages and U-Pb zircon geochronology: *Gondwana Research*, v. 51, p.  
 159 209–233, doi:10.1016/j.gr.2017.07.016.

160 Gehrels, G., 2011, Detrital Zircon U-Pb Geochronology: Current Methods and New  
 161 Opportunities, in *Tectonics of Sedimentary Basins*, John Wiley & Sons, Ltd, p. 45–  
 162 62, doi:10.1002/9781444347166.ch2.

163 Griffin, W.L., Belousova, E.A., Shee, S.R., Pearson, N.J., and O'Reilly, S.Y., 2004, Archean  
 164 crustal evolution in the northern Yilgarn Craton: U–Pb and Hf-isotope evidence from  
 165 detrital zircons: *Precambrian Research*, v. 131, p. 231–282,  
 166 doi:10.1016/j.precamres.2003.12.011.

167 Griffin, W.L., Wang, X., Jackson, S.E., Pearson, N.J., O'Reilly, S.Y., Xu, X., and Zhou, X.,  
 168 2002, Zircon chemistry and magma mixing, SE China: In-situ analysis of Hf isotopes,

169 Tonglu and Pingtan igneous complexes: *Lithos*, v. 61, p. 237–269,  
 170 doi:10.1016/S0024-4937(02)00082-8.

171 Grimes, C.B., John, B.E., Kelemen, P.B., Mazdab, F.K., Wooden, J.L., Cheadle, M.J.,  
 172 Hanghøj, K., and Schwartz, J.J., 2007, Trace element chemistry of zircons from  
 173 oceanic crust: A method for distinguishing detrital zircon provenance: *Geology*, v. 35,  
 174 p. 643 – 646, doi:10.1130/G23603A.1.

175 Hoskin, P.W.O., and Schaltegger, U., 2003, The Composition of Zircon and Igneous and  
 176 Metamorphic Petrogenesis: *Reviews in Mineralogy and Geochemistry*, v. 53, p. 27–  
 177 62, doi:10.2113/0530027.

178 Kueter, N., Soesilo, J., Fedortchouk, Y., Nestola, F., Belluco, L., Troch, J., Wälle, M.,  
 179 Guillong, M., Von Quadt, A., and Driesner, T., 2016, Tracing the depositional history  
 180 of Kalimantan diamonds by zircon provenance and diamond morphology studies:  
 181 *Lithos*, v. 265, p. 159–176, doi:10.1016/j.lithos.2016.05.003.

182 Linnemann, U., Ouzegane, K., Drareni, A., Hofmann, M., Becker, S., Gärtner, A., and  
 183 Sagawe, A., 2011, Sands of West Gondwana: An archive of secular magmatism and  
 184 plate interactions — A case study from the Cambro-Ordovician section of the Tassili  
 185 Ouan Ahaggar (Algerian Sahara) using U–Pb–LA-ICP-MS detrital zircon ages:  
 186 *Lithos*, v. 123, p. 188–203, doi:10.1016/j.lithos.2011.01.010.

187 Liu, Y., Hu, Z., Zong, K., Gao, C., Gao, S., Xu, J., and Chen, H., 2010, Reappraisal and  
 188 refinement of zircon U-Pb isotope and trace element analyses by LA-ICP-MS:  
 189 *Chinese Science Bulletin*, v. 55, p. 1535–1546, doi:10.1007/s11434-010-3052-4.

190 Matteini, M., Dantas, E.L., Pimentel, M.M., and Bühn, B., 2010, Combined U-Pb and Lu-Hf  
 191 isotope analyses by laser ablation MC-ICP-MS: methodology and applications: *Anais*  
 192 *da Academia Brasileira de Ciências*, v. 82, p. 479–491, doi:10.1590/S0001-  
 193 37652010000200023.

194 Patchett, P.J., and Tatsumoto, M., 1981, A routine high-precision method for Lu-Hf isotope  
 195 geochemistry and chronology: *Contributions to Mineralogy and Petrology*, v. 75, p.  
 196 263–267, doi:10.1007/BF01166766.

197 Sláma, J. et al., 2008, Plešovice zircon — A new natural reference material for U–Pb and Hf  
 198 isotopic microanalysis: *Chemical Geology*, v. 249, p. 1–35,  
 199 doi:10.1016/j.chemgeo.2007.11.005.

200 Söderlund, U., Patchett, P.J., Vervoort, J.D., and Isachsen, C.E., 2004, The  $^{176}\text{Lu}$  decay  
 201 constant determined by Lu–Hf and U–Pb isotope systematics of Precambrian mafic  
 202 intrusions: *Earth and Planetary Science Letters*, v. 219, p. 311–324,  
 203 doi:10.1016/S0012-821X(04)00012-3.

204 Vermeesch, P., 2018, IsoplotR: A free and open toolbox for geochronology: *Geoscience*  
 205 *Frontiers*, v. 9, p. 1479–1493, doi:10.1016/j.gsf.2018.04.001.

206 Vermeesch, P., 2021a, Maximum depositional age estimation revisited: *Geoscience Frontiers*,  
 207 v. 12, p. 843–850, doi:10.1016/j.gsf.2020.08.008.

208 Vermeesch, P., 2021b, On the treatment of discordant detrital zircon U–Pb data:  
 209 *Geochronology*, v. 3, p. 247–257, doi:10.5194/gchron-3-247-2021.

210 Vervoort, J.D., and Blichert-Toft, J., 1999, Evolution of the depleted mantle: Hf isotope  
 211 evidence from juvenile rocks through time: *Geochimica et Cosmochimica Acta*, v. 63,  
 212 p. 533–556, doi:10.1016/S0016-7037(98)00274-9.

213 Wang, Q., Zhu, D.-C., Zhao, Z.-D., Guan, Q., Zhang, X.-Q., Sui, Q.-L., Hu, Z.-C., and Mo,  
 214 X.-X., 2012, Magmatic zircons from I-, S- and A-type granitoids in Tibet: Trace  
 215 element characteristics and their application to detrital zircon provenance study:  
 216 *Journal of Asian Earth Sciences*, v. 53, p. 59–66, doi:10.1016/j.jseaes.2011.07.027.

217 Wang, Y. et al., 2022a, Jurassic subduction of the Paleo-Pacific plate in Southeast Asia: New  
 218 insights from the igneous and sedimentary rocks in West Borneo: *Journal of Asian*  
 219 *Earth Sciences*, v. 232, p. 105111, doi:10.1016/j.jseaes.2022.105111.

220 Wang, F., Ge, C., Ning, S., Nie, L., Zhong, G., and White, N.C., 2017, A new approach to  
 221 LA-ICP-MS mapping and application in geology: *Acta Petrologica Sinica*, v. 33, p.  
 222 3422–3436.

223 Wang, Y., Qian, X., Cawood, P.A., Ghani, A., Gan, C., Wu, S., Zhang, Y., Wang, Y., and  
 224 Zhang, P., 2022b, Cretaceous Tethyan subduction in SE Borneo: Geochronological  
 225 and geochemical constraints from the igneous rocks in the Meratus Complex: *Journal*  
 226 *of Asian Earth Sciences*, v. 226, p. 105084, doi:10.1016/j.jseaes.2022.105084.

227 Wang, Y., Zhang, A., Qian, X., Asis, J.B., Feng, Q., Gan, C., Zhang, Y., Cawood, P.A.,  
 228 Wang, W., and Zhang, P., 2021, Cretaceous Kuching accretionary orogenesis in  
 229 Malaysia Sarawak: Geochronological and geochemical constraints from mafic and  
 230 sedimentary rocks: *Lithos*, v. 400–401, p. 106425, doi:10.1016/j.lithos.2021.106425.

231 Wiedenbeck, M., Allé, P., Corfu, F., Griffin, W.L., Meier, M., Oberli, F., Quadt, A.V.,  
 232 Roddick, J.C., and Spiegel, W., 1995, Three Natural Zircon Standards for U-Th-Pb,  
 233 Lu-Hf, Trace Element and Ree Analyses: *Geostandards Newsletter*, v. 19, p. 1–23,  
 234 doi:10.1111/j.1751-908X.1995.tb00147.x.

235 Witts, D., Hall, R., Nichols, G., and Morley, R., 2012, A new depositional and provenance  
 236 model for the Tanjung Formation, Barito Basin, SE Kalimantan, Indonesia: *Journal of*  
 237 *Asian Earth Sciences*, v. 56, p. 77–104, doi:10.1016/j.jseaes.2012.04.022.

238 Wu, F.-Y., Yang, Y.-H., Xie, L.-W., Yang, J.-H., and Xu, P., 2006, Hf isotopic compositions  
 239 of the standard zircons and baddeleyites used in U–Pb geochronology: *Chemical*  
 240 *Geology*, v. 234, p. 105–126, doi:10.1016/j.chemgeo.2006.05.003.

241

242 Zhao, Q., Yan, Y., Zhu, Z., Carter, A., Clift, P.D., Amir Hassan, M.H., Yao, D., and Aziz,  
 243 J.H.A., 2021, Provenance study of the Lubok Antu Mélange from the Lupar valley,  
 244 West Sarawak, Borneo: Implications for the closure of eastern Meso-Tethys?  
 245 Chemical Geology, v. 581, p. 120415, doi:10.1016/j.chemgeo.2021.120415.  
 246 Zimmermann, S., and Hall, R., 2019, Provenance of Cretaceous sandstones in the Banda Arc  
 247 and their tectonic significance: Gondwana Research, v. 67, p. 1–20,  
 248 doi:10.1016/j.gr.2018.09.008.  
 249 Zimmermann, S., and Hall, R., 2016, Provenance of Triassic and Jurassic sandstones in the  
 250 Banda Arc: Petrography, heavy minerals and zircon geochronology: Gondwana  
 251 Research, v. 37, p. 1–19, doi:10.1016/j.gr.2016.06.001.  
 252

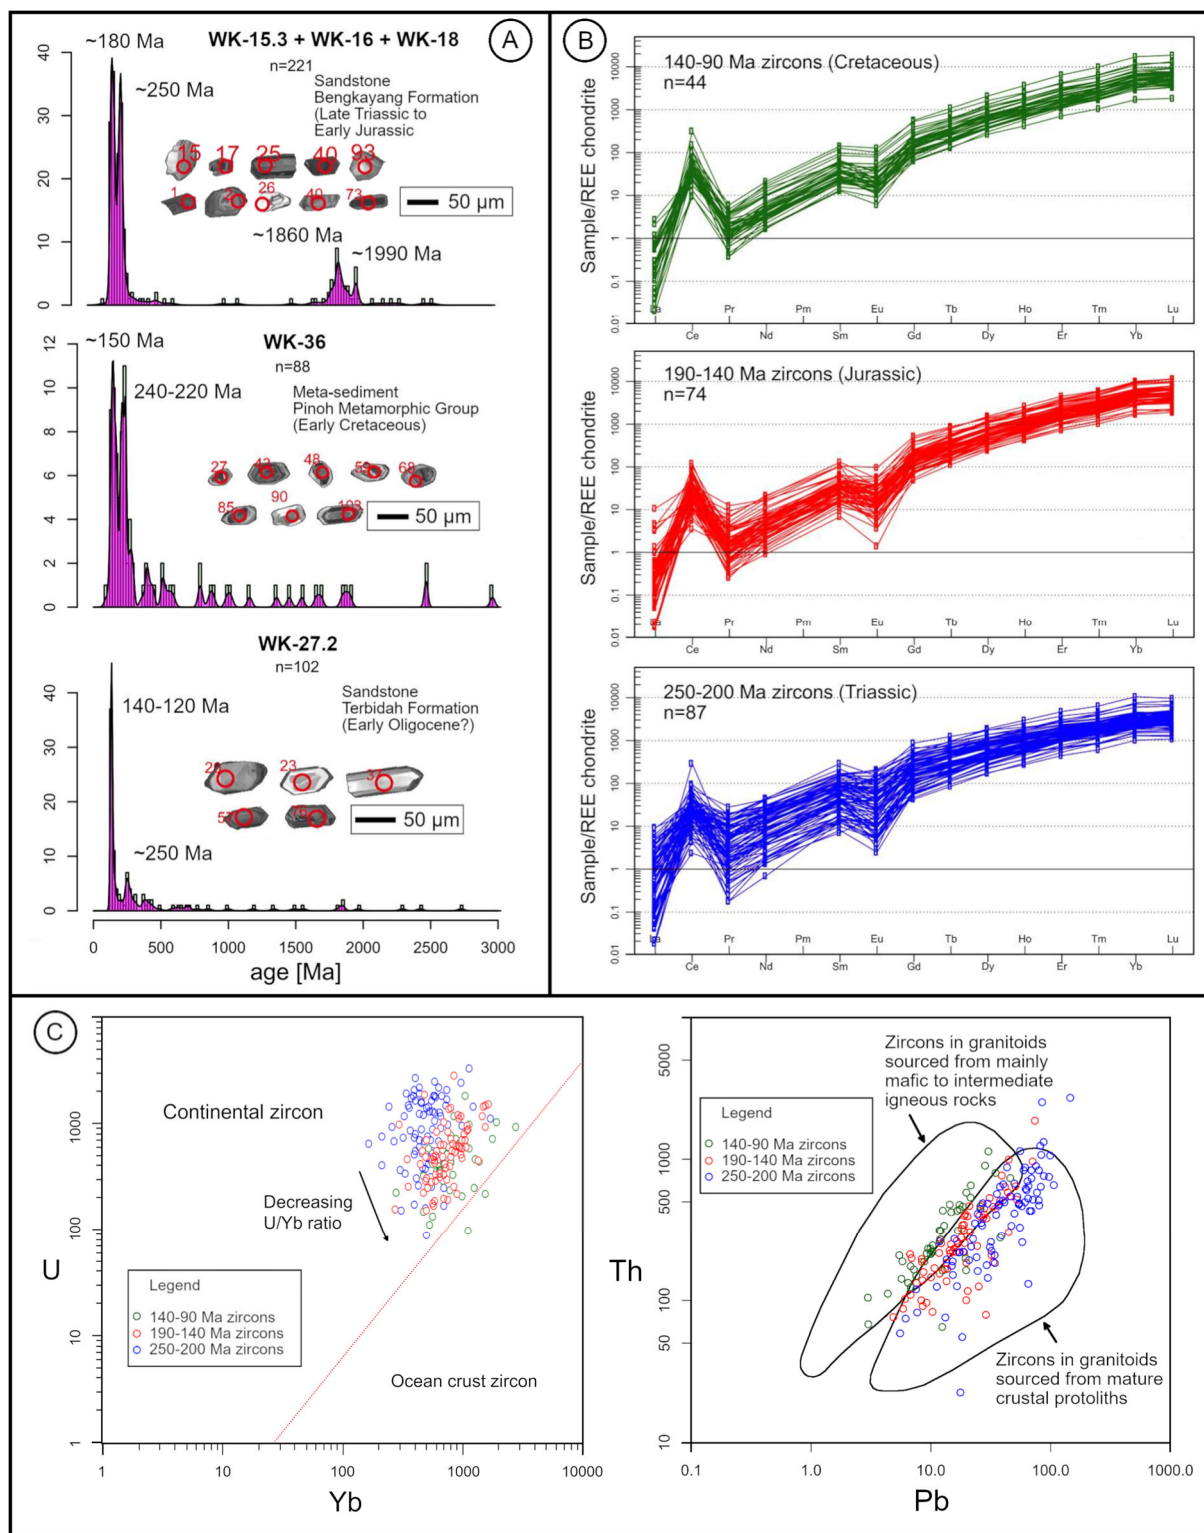

Fig. S1

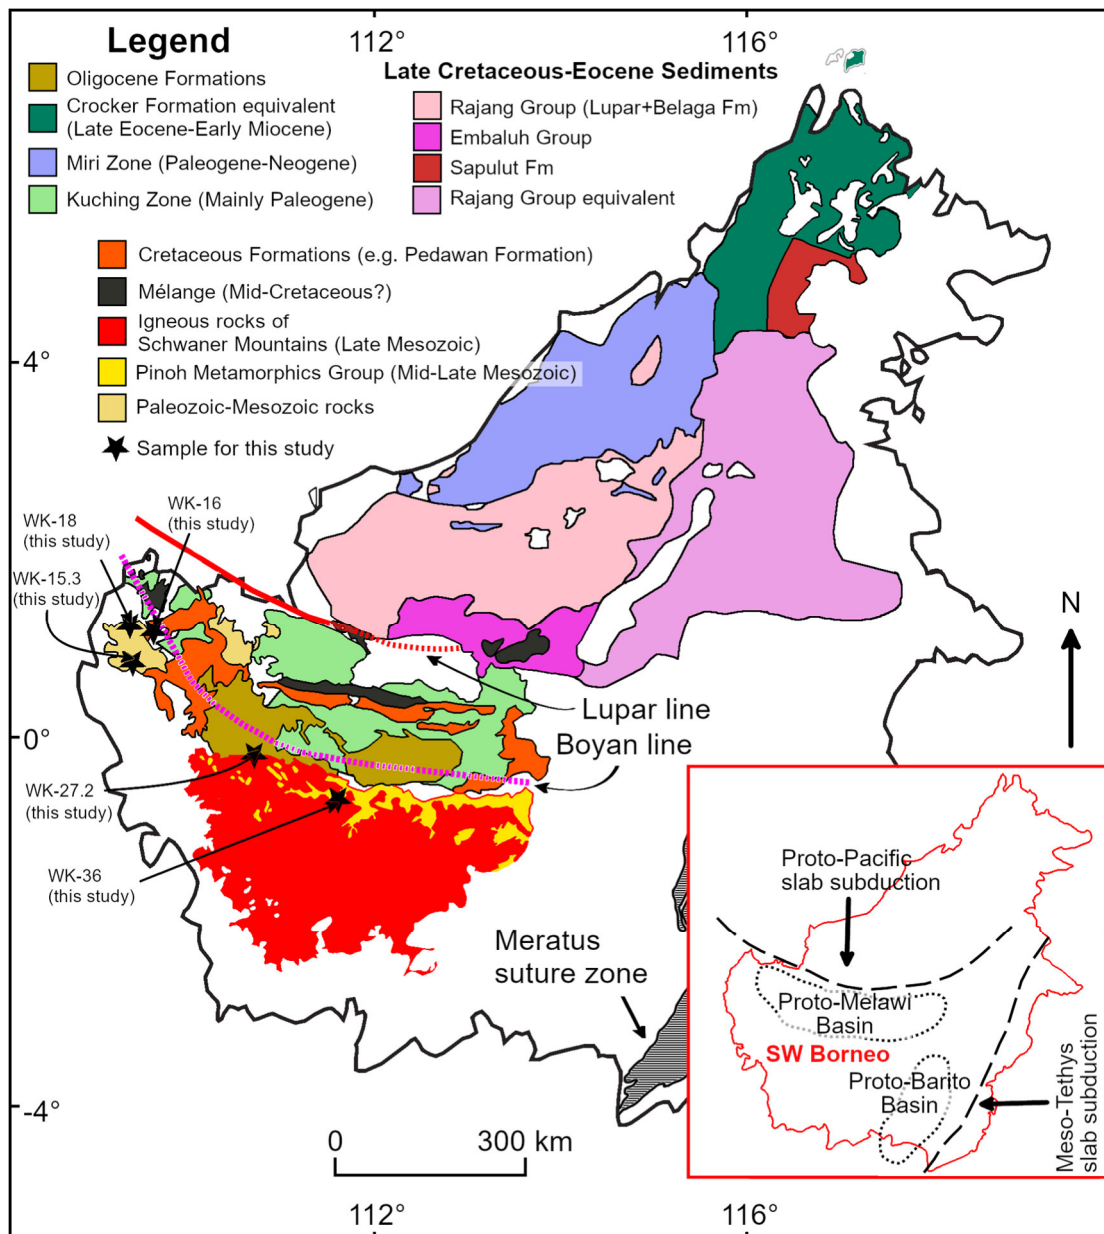

Fig. S2
